# Supplementary material
Source: publisher figshare collection journal article supplement (https://sage.figshare.com/ndownloader/files/15289952)
Supplement: Supplementary file 1 [file 15289952]

## Appendix 1: Detailed information about media reports

| Media                        | Title of the data                                                                                                                                                           | Link                                                                                                                                                                                                                                  |
|------------------------------|-----------------------------------------------------------------------------------------------------------------------------------------------------------------------------|---------------------------------------------------------------------------------------------------------------------------------------------------------------------------------------------------------------------------------------|
| Beijing Time                 | An eleven-year boy died using a shared bike: to what extent should the responsibility be assumed by Ofo?                                                                    | <a href="http://item.btime.com/3457ajl74jq9o2aqm0na16oek2m?from=mini">http://item.btime.com/3457ajl74jq9o2aqm0na16oek2m?from=mini</a>                                                                                                 |
| Business Insider             | Uber to merge with Chinese rival Didi in \$35 billion deal                                                                                                                  | <a href="http://www.businessinsider.com/uber-china-merges-with-didi-chuxing-2016-7">http://www.businessinsider.com/uber-china-merges-with-didi-chuxing-2016-7</a>                                                                     |
| Caijing Net                  | Didi has resulted in complaints from passengers and drivers, and the industry was questioned in the name of the sharing economy although it is essentially a rental company | <a href="http://industry.caijing.com.cn/20170815/4316813.shtml">http://industry.caijing.com.cn/20170815/4316813.shtml</a>                                                                                                             |
| China Daily                  | China tech giants in taxi-app battle                                                                                                                                        | <a href="http://usa.chinadaily.com.cn/epaper/2014-12/15/content_19088146.htm">http://usa.chinadaily.com.cn/epaper/2014-12/15/content_19088146.htm</a>                                                                                 |
|                              | Bike sharing has a national guideline                                                                                                                                       | <a href="http://usa.chinadaily.com.cn/epaper/2017-08/04/content_30348120.htm">http://usa.chinadaily.com.cn/epaper/2017-08/04/content_30348120.htm</a>                                                                                 |
|                              | Bluegogo goes hi-tech, finds for-profit model with advertising                                                                                                              | <a href="http://www.chinadaily.com.cn/china/2017-05/19/content_29423549.htm">http://www.chinadaily.com.cn/china/2017-05/19/content_29423549.htm</a>                                                                                   |
|                              | The parking of the shared bikes is getting smart                                                                                                                            | <a href="http://africa.chinadaily.com.cn/china/2017-08/14/content_30575233.htm">http://africa.chinadaily.com.cn/china/2017-08/14/content_30575233.htm</a>                                                                             |
|                              | Beijing to pilot 'e-fence' for parking the shared bikes                                                                                                                     | <a href="http://www.chinadaily.com.cn/china/2017-05/18/content_29396331.htm">http://www.chinadaily.com.cn/china/2017-05/18/content_29396331.htm</a>                                                                                   |
|                              | Rules to regulate the shared bikes are released                                                                                                                             | <a href="http://usa.chinadaily.com.cn/china/2017-05/23/content_29453782.htm">http://usa.chinadaily.com.cn/china/2017-05/23/content_29453782.htm</a>                                                                                   |
|                              | Bike-sharing helps ease traffic jams in China                                                                                                                               | <a href="http://www.chinadaily.com.cn/china/2017-07/25/content_30240563.htm">http://www.chinadaily.com.cn/china/2017-07/25/content_30240563.htm</a>                                                                                   |
| China News Net               | Mobike released a preannouncement that asked citizens to park the shared bikes in a civilized way                                                                           | <a href="http://www.chinanews.com/business/2017/07-24/8285995.shtml">http://www.chinanews.com/business/2017/07-24/8285995.shtml</a>                                                                                                   |
| Eastday net                  | The implementation of the regulation on ridesharing does not lose fairness                                                                                                  | <a href="http://news.eastday.com/eastday/13news/auto/news/china/20170620/u7ai6864694.html">http://news.eastday.com/eastday/13news/auto/news/china/20170620/u7ai6864694.html</a>                                                       |
| Economic Development Daily   | Intelligence may be helpful in resolving the issues resulting from the shared bikes                                                                                         | <a href="http://jjckb.xinhuanet.com/2017-09/19/c_136619786.htm">http://jjckb.xinhuanet.com/2017-09/19/c_136619786.htm</a>                                                                                                             |
| Finance China                | China Daily: the regulation of ridesharing should avoid "hollowing out"                                                                                                     | <a href="http://finance.china.com.cn/industry/20170821/4359712.shtml">http://finance.china.com.cn/industry/20170821/4359712.shtml</a>                                                                                                 |
| Guancha Zhe                  | Beijing, Shanghai and Guangzhou have fully prohibited the services provided by private-hire drivers through Didi                                                            | <a href="http://www.guancha.cn/Science/2015_01_09_305781.shtml">http://www.guancha.cn/Science/2015_01_09_305781.shtml</a>                                                                                                             |
| International Business Times | China's ride-sharing market heats up: KuaiDi, Didi talk merger ahead of Uber's arrival                                                                                      | <a href="http://www.ibtimes.com/chinas-ride-sharing-market-heats-kuaidi-didi-talk-merger-ahead-ubers-arrival-1815450">http://www.ibtimes.com/chinas-ride-sharing-market-heats-kuaidi-didi-talk-merger-ahead-ubers-arrival-1815450</a> |

|                  |                                                                                                                                          |                                                                                                                                             |
|------------------|------------------------------------------------------------------------------------------------------------------------------------------|---------------------------------------------------------------------------------------------------------------------------------------------|
| Mobike           | Mobike released the first preannouncement in the bike sharing industry that asked all citizens to park bikes in a civilized way          | <a href="https://mobike.com/cn/archives/337">https://mobike.com/cn/archives/337</a>                                                         |
|                  | Mobike together with the United Nations Environment Program (UNEP) initiated the first World Bicycle Day                                 | <a href="https://mobike.com/cn/news/355">https://mobike.com/cn/news/355</a>                                                                 |
| Netease          | The merger of Kuaidi and Didi: not for money, but for opportunities                                                                      | <a href="http://tech.163.com/15/0214/12/AIDQ3Q96000915BF.html">http://tech.163.com/15/0214/12/AIDQ3Q96000915BF.html</a>                     |
|                  | The frequent occurrences of violent conflicts between taxis and ridesharing: who is the real enemy of taxis?                             | <a href="http://auto.163.com/16/0629/09/BQNIA2BQ00084TV1.html">http://auto.163.com/16/0629/09/BQNIA2BQ00084TV1.html</a>                     |
|                  | China is not the real kingdom of bicycle                                                                                                 | <a href="http://discovery.163.com/14/0330/21/9OK7T1O300014N6R.html">http://discovery.163.com/14/0330/21/9OK7T1O300014N6R.html</a>           |
| Phoenix          | The Ministry of Transport has published a report on ridesharing: the focus is on whether the platform should be regulated                | <a href="http://finance.ifeng.com/a/20151129/14097191_0.shtml">http://finance.ifeng.com/a/20151129/14097191_0.shtml</a>                     |
| Qiye Guancha Bao | Eight ministries jointly advance the “sharing economy” as a national strategy                                                            | <a href="http://www.cneo.com.cn/article-30635-1.html">http://www.cneo.com.cn/article-30635-1.html</a>                                       |
| Sina             | The Ministry of Transport: establishing a national ridesharing monitoring platform and further advancing the reform of the taxi industry | <a href="http://news.sina.com.cn/o/2017-07-29/doc-ifyinryq6960296.shtml">http://news.sina.com.cn/o/2017-07-29/doc-ifyinryq6960296.shtml</a> |

## Appendix 2: Interviewee list

| No. | Respondent              | Personal information                                              |
|-----|-------------------------|-------------------------------------------------------------------|
| 1   | Official                | Official in transportation management bureau of the police bureau |
| 2   | Driver                  | Private-hire car driver                                           |
| 3   | Driver                  | Taxi driver                                                       |
| 4   | Driver                  | Private-hire car driver                                           |
| 5   | Researcher              | Expert in ridesharing company                                     |
| 6   | Manager of shared bikes | Staff in street office                                            |
| 7   | Driver                  | Private-hire car driver                                           |
| 8   | Resident                | User of bike sharing and ridesharing                              |
| 9   | Expert                  | Sharing economy expert at a university                            |
| 10  | Official                | Official in transportation management bureau of the police bureau |
